# Supplementary material for: Two New Nonaborates with {B9} Cluster Open-Frameworks and Short Cutoff Edges
Source: MDPI journal article supplement (doi:10.3390/molecules27165279), 2022-08-18
Supplement: s1 [file s1]

---

## *Supplementary Materials*

# Two New Nonaborates with {B<sub>9</sub>} Cluster Open-Frameworks and Short Cutoff Edges

Chong-An Chen and Guo-Yu Yang \*

MOE Key Laboratory of Cluster Science, School of Chemistry and Chemical Engineering, Beijing Institute of Technology, Beijing 100081, China; cca@bit.edu.cn

\* Correspondence: ygy@bit.edu.cn or ygy@fjirsm.ac.cn

---

Table S1. Hydrogen bond distances (Å) and angles (°) for the compound **2**.

Figure S1. Porous layered structure (a) and the seven intercommunicated channels (b) in [H<sub>3</sub>O]K<sub>3.52</sub>Na<sub>3.48</sub>{Al<sub>2</sub>[B<sub>7</sub>O<sub>13</sub>(OH)][B<sub>5</sub>O<sub>10</sub>][B<sub>3</sub>O<sub>5</sub>]}[CO<sub>3</sub>].

Figure S2. (a) Metal positions in the framework of **1**; (b) Na<sub>4</sub>BaO<sub>28</sub> pentamers in **1**.

Figure S3. (a) Metal positions in framework **2**; (b) Metal-O monolayer in **2**; (c) Metal-oxygen porous layer in **2**.

Figure S4. PXRD of **1** (a) and **2** (b).

Figure S5. IR spectra of **1** and **2**.

Figure S6. TG curves of **1** and **2**.

---

**Table S1.** Hydrogen bond distances (Å) and angles (°) for the compound **2**.

| D–H···A            | d(D–H) | d(H···A) | d(D···A) | ∠(DHA) (°) |
|--------------------|--------|----------|----------|------------|
| O(7)–H(7)···O(8)#1 | 0.81   | 2.38     | 2.9314   | 126.0      |
| O(7)–H(7)···O(9)#1 | 0.81   | 2.36     | 3.0801   | 149.6      |

Symmetric codes: #1:  $x, -y, -1/2 + z$ .

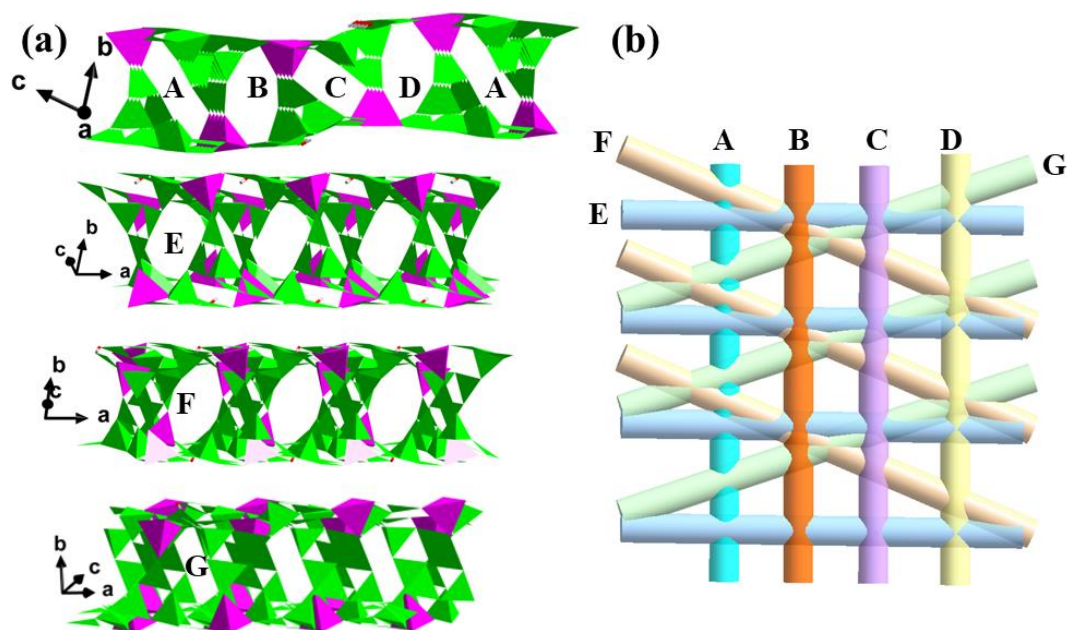

**Figure S1.** Porous layered structure (a) and the seven intercommunicated channels (b) in  $[\text{H}_3\text{O}]\text{K}_{3.52}\text{Na}_{3.48}\{\text{Al}_2[\text{B}_7\text{O}_{13}(\text{OH})][\text{B}_5\text{O}_{10}][\text{B}_3\text{O}_5]\}[\text{CO}_3]$ .

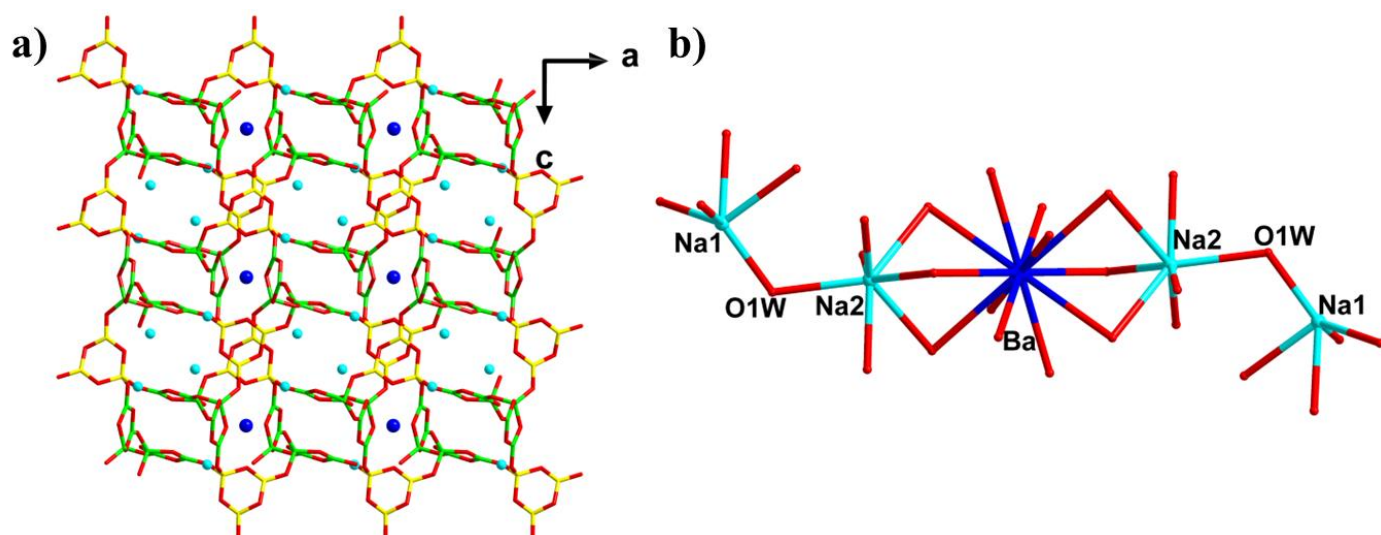

**Figure S2.** (a) Metal positions in the framework of **1**; (b)  $\text{Na}_4\text{BaO}_{28}$  pentamers in **1**.

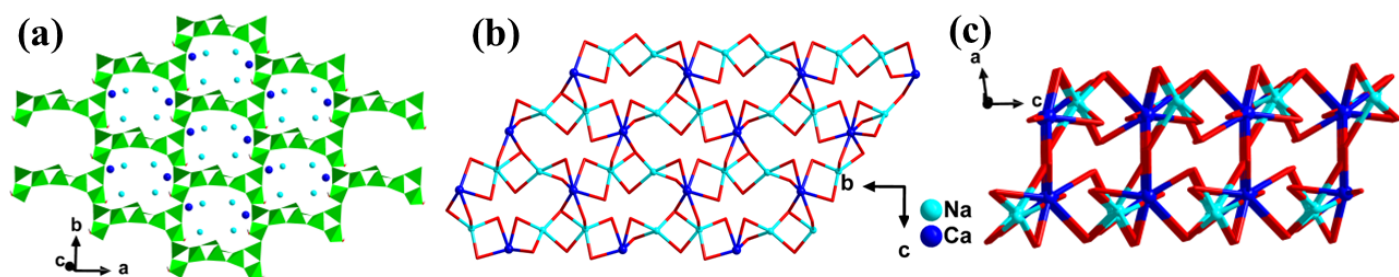

Figure S3. (a) Metal positions in the framework of 2; (b) Metal-oxygen monolayer in 2; (c) Metal-oxygen porous layer in 2.

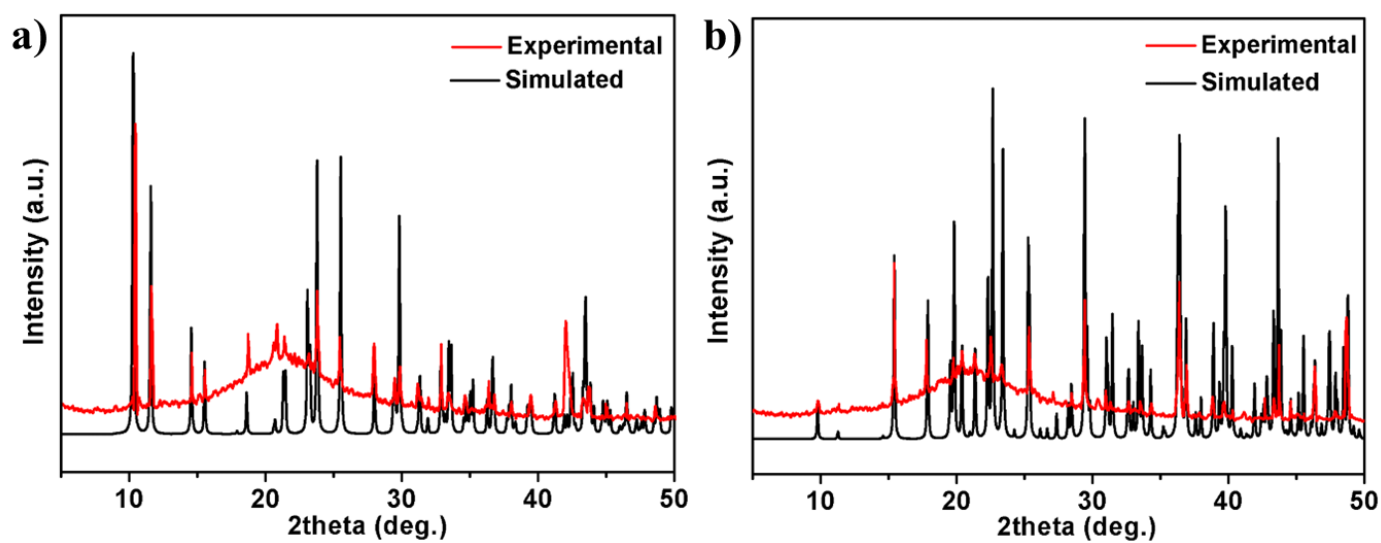

Figure S4. PXRD of 1 (a) and 2 (b).

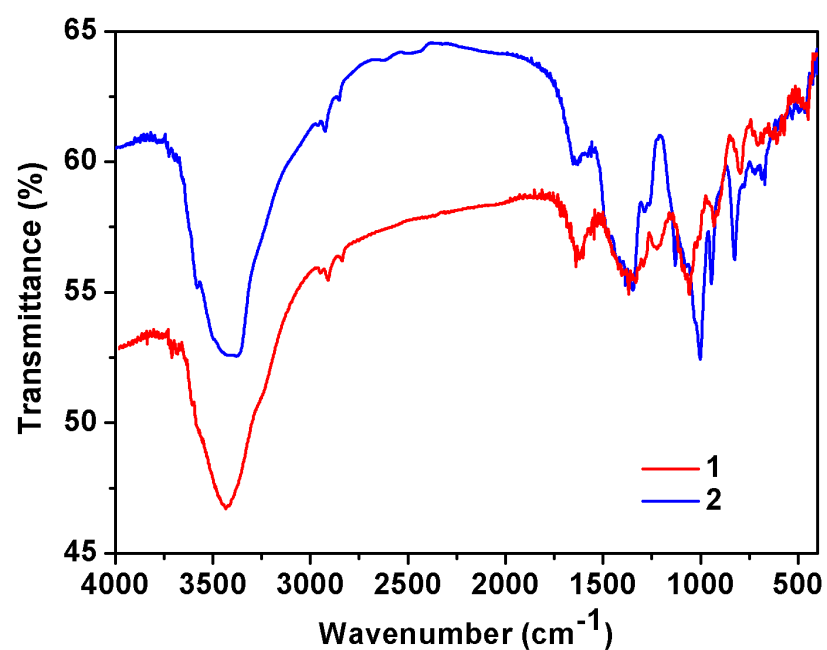

Figure S5. IR spectra of 1 and 2.

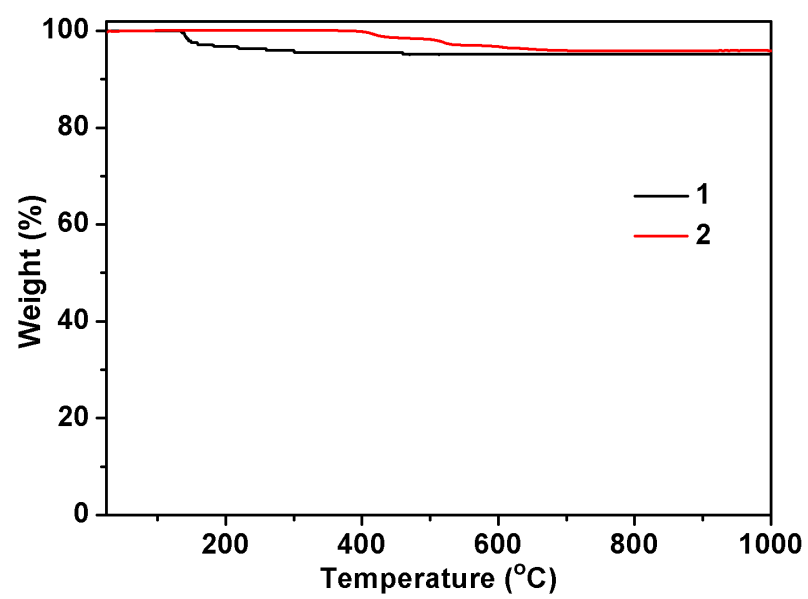

Figure S6. TG curves of 1 and 2.
